# Supplementary material
Source: Springer Nature journal article supplement (https://www.springermedizin.de/resource/supplementary/12955_2012_957_MOESM4_ESM.pdf/9558840)

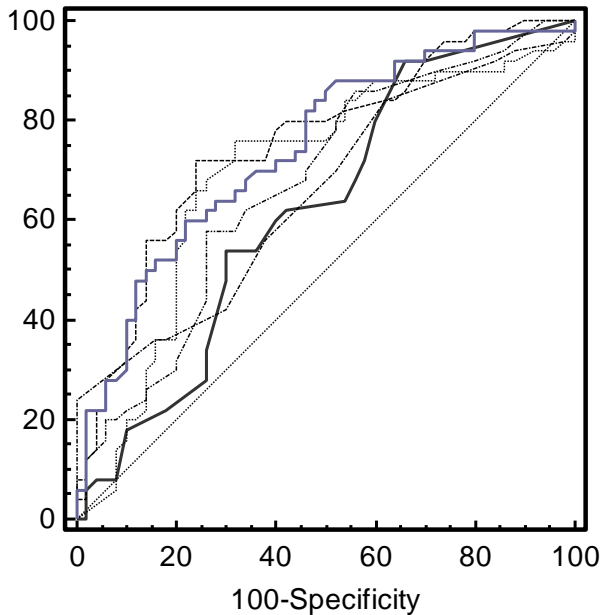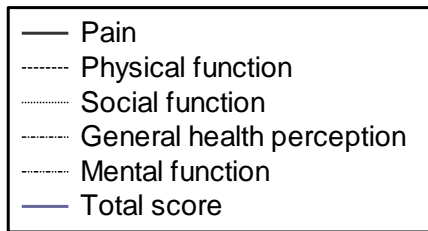

Supplement: MOESM4 [file 9558840]
